# Supplementary material for: Use of Cannabis and Cannabinoids for Treatment of Cancer
Source: MDPI journal article supplement (doi:10.3390/cancers14205142), 2022-10-20
Supplement: s1 [file s1]

Supplementary Table S1. Clinical trials related to cannabinoid use in cancer (source clinicaltrials.gov as of 06.22.2022).

| Official title                                                                                                                                                                                                                                                                                                             | Condition or disease                                                                                               | Comparison group/Cohort                                                                                               | Outcome    | Identifier  |
|----------------------------------------------------------------------------------------------------------------------------------------------------------------------------------------------------------------------------------------------------------------------------------------------------------------------------|--------------------------------------------------------------------------------------------------------------------|-----------------------------------------------------------------------------------------------------------------------|------------|-------------|
| Palliative care                                                                                                                                                                                                                                                                                                            |                                                                                                                    |                                                                                                                       |            |             |
| Inhaled PPP001 Versus Immediate-release Oral Opioids for the Management of Breakthrough Pain in Cancer Subjects: a Randomized, Open-Label, Crossover, Comparison Study                                                                                                                                                     | Cancer Breakthrough Cancer Pain                                                                                    | Experimental Drug: PPP001 (inhaled cannabinoids)<br>Active Comparator: Morphine sulfate or Hydromorphone or Oxycodone | Recruiting | NCT03564548 |
| Safety And Efficacy Of Ppp001-kit For The Uncontrolled Pain Relief In Patients With Advanced Cancer: A Randomized, Double-Blind, Placebo-Controlled, Parallel Group Study                                                                                                                                                  | Cancer Pain<br>Quality of Life<br>Pain,<br>Acute Cannabis Use                                                      | Drug: PPP001 (cannabis dosing capsule with THC/CBD) inhalation with a device<br>Drug: Placebo                         | Recruiting | NCT04042545 |
| Patient Reported Symptom Control With THC and CBD Use                                                                                                                                                                                                                                                                      | Cancer-associated Pain<br>Hematopoietic and Lymphoid Cell Neoplasm<br>Malignant Solid Neoplasm                     | Electronic Health Record Review<br>Questionnaire Administration                                                       | Recruiting | NCT04875286 |
| Quantification of Endo- and Phytocannabinoids With Comparison to Pain Medication Requirements and Surgical Outcomes for Patients Undergoing Abdominal Surgery for Cancer                                                                                                                                                   | Post-Surgical Pain<br>Post-surgical complication<br>Cancer<br>Cannabis use                                         | Daily cannabis users<br>Cannabis non-users                                                                            | Recruiting | NCT04988490 |
| Multicenter, Randomized, Double-blind, Placebo-controlled, Phase III Clinical Trial to Investigate the Efficacy and Safety of Dronabinol in the Improvement of Chemotherapy-induced and Tumor-Related Symptoms in Patients With Locally Advanced or Metastatic Pancreatic Cancer During First-line Chemotherapy (DIsCOvER) | Pancreatic Cancer<br>Non-resectable<br>Chemotherapy-induced Nausea and Vomiting<br>Pancreatic Cancer<br>Metastatic | Drug: Dronabinol in Oral Dosage Form<br>Drug: Placebo                                                                 | Recruiting | NCT03984214 |

|                                                                                                                                                                                                                                                       |                                                                                                              |                                                                                                                       |                         |             |
|-------------------------------------------------------------------------------------------------------------------------------------------------------------------------------------------------------------------------------------------------------|--------------------------------------------------------------------------------------------------------------|-----------------------------------------------------------------------------------------------------------------------|-------------------------|-------------|
| Treatment of Established Chemotherapy-Induced Neuropathy With N-Palmitoylethanolamide, a Cannabimimetic Nutraceutical: A Randomized Double-Blind Phase II Pilot Trial                                                                                 | Chemotherapy-Induced Peripheral Neuropathy Hematopoietic and Lymphoid Cell Neoplasm Malignant Solid Neoplasm | Drug: Palmidrol<br>Drug: Placebo<br>Administration Other: Quality-of-Life Assessment                                  | Recruiting              | NCT05246670 |
| NanaBis™ an Oro-buccal Administered Equimolar delta-9-THC & CBD Formulation as Monotherapy for Management of Opioid Requiring Bone Pain Due to Metastatic Cancer Phase 3 Multi Centre Blinded Randomized Withdrawal Active & Placebo Controlled Trial | Cancer-related pain                                                                                          | Drug: NanaBis™<br>Drug: Oxycodone CR<br>Drug: Placebo Spray<br>Drug: Placebo Tablet<br>Drug: Oxycodone IR             | Not yet recruiting      | NCT04808531 |
| Pharmacokinetic and Pharmacodynamic Evaluation of 3 Standard Formulations of Δ9-THC in Healthy Volunteers and Post-chemotherapy Patients in Colombia                                                                                                  | Nausea Post-Chemotherapy Vomiting Cancer Pain Cancer-Related Pain Neoplasm                                   | Drug: Pharmacokinetic and pharmacodynamic profile of THC oral formulations with Dronabinol as comparator              | Not yet recruiting      | NCT05272865 |
| A Randomized, Double-Blind, Placebo-Controlled, Multiple Crossover N-of-1 Study Design of the Use of Medicinal Cannabis Oil-Based Extracts for Symptom Management in Cancer Patients                                                                  | Pain Nausea Anxiety Sleep Disturbance                                                                        | Drug: Cannabis                                                                                                        | Active, not recruiting  | NCT03948074 |
| A Double-blind, Randomized, Placebo Controlled Clinical Trial to Evaluate the Efficacy of Orexigenic Therapy With Delta-9-tetrahydrocannabinol in Advanced Cancer Patients With Chemosensory Abnormalities - a Pilot Study                            | Cancer Anorexia Taste Disorders Olfactory Disorders                                                          | Drug: Marinol<br>(Dronabinol) Marinol is being used as an appetite stimulant for treatment of cancer-induced anorexia | Completed (no results)  | NCT00316563 |
| A Pilot Trial to Evaluate Syndros in Decreasing Opioid Requirement in Patients With Bone Metastases From Breast Cancer                                                                                                                                | Bone Metastases Breast Cancer Pain                                                                           | Drug: Syndros<br>(Dronabinol)                                                                                         | Completed (no results)  | NCT03661892 |
| A Double Blind, Randomized, Placebo Controlled, Parallel Group Dose-range Exploration                                                                                                                                                                 | Palliative Care Pain Cancer                                                                                  | Drug: Sativex Low Dose<br>Drug: Sativex Medium Dose                                                                   | No baseline differences | NCT00530764 |

|                                                                                                                                                                                                                                        |                                                                        |                                                                                                                                                                           |                                                                                                                    |             |
|----------------------------------------------------------------------------------------------------------------------------------------------------------------------------------------------------------------------------------------|------------------------------------------------------------------------|---------------------------------------------------------------------------------------------------------------------------------------------------------------------------|--------------------------------------------------------------------------------------------------------------------|-------------|
| Study of Sativex® in Relieving Pain in Patients With Advanced Cancer, Who Experience Inadequate Analgesia During Optimized Chronic Opioid Therapy                                                                                      |                                                                        | Drug: Sativex High Dose                                                                                                                                                   | across the groups. Demonstrated efficacy and safety in low- and medium doses (238)                                 |             |
| Randomized, Double-Blind, Placebo-Controlled Trial of Palonosetron/Dexamethasone With or Without Dronabinol for the Prevention of Chemotherapy-Induced Nausea and Vomiting After Moderately Emetogenic Chemotherapy                    | Chemotherapy-induced Nausea and Vomiting Unspecified Adult Solid Tumor | Arm 1<br>Drug: Dexamethasone<br>Drug: Dronabinol<br>Drug: Palonosetron Hydrochloride<br>Arm 2<br>Drug: Dexamethasone<br>Drug: Palonosetron Hydrochloride<br>Drug: Placebo | Completed (no publications)                                                                                        | NCT00553059 |
| A Multicenter, Non-comparative, Open-label Extension Study to Assess the Long Term Safety of Sativex Oromucosal Spray (Sativex; Nabiximols) as Adjunctive Therapy in Patients With Uncontrolled Persistent Chronic Cancer-Related Pain | Pain Advanced Cancer                                                   | Drug: Nabiximols                                                                                                                                                          | Completed (no publications)                                                                                        | NCT01337089 |
| A Double Blind, Randomized, Parallel Group, Placebo Controlled, Comparative Study of the Efficacy, Safety and Tolerability of Cannabis Based Medicine (CBM) Extracts in Patients With Cancer-related Pain                              | Palliative care Pain Cancer                                            | Drug: Placebo<br>Drug: Sativex<br>Drug: THC Alone                                                                                                                         | The mean pain Numerical Rating Scale score was statistically significant for THC/CBD group in pain reduction (239) | NCT00674609 |
| An Open-label, Extension Study, to Investigate the Long-term Safety and Tolerability of Cannabis Based Medicine Extracts in Patients With Cancer-related Pain                                                                          | Pain Cancer                                                            | Drug: Sativex<br>Drug: GW-2000-02 (THC alone)                                                                                                                             | In mean Brief Pain Inventory-Short Form Scores for "pain severity" and "worst pain" showed an                      | NCT00675948 |

|                                                                                                                                  |                                                                                                                                                                                                                                                                                                                                                                                                                                        |                                                      |                                                |             |
|----------------------------------------------------------------------------------------------------------------------------------|----------------------------------------------------------------------------------------------------------------------------------------------------------------------------------------------------------------------------------------------------------------------------------------------------------------------------------------------------------------------------------------------------------------------------------------|------------------------------------------------------|------------------------------------------------|-------------|
|                                                                                                                                  |                                                                                                                                                                                                                                                                                                                                                                                                                                        |                                                      | improvement in the THC/CBD spray patients(240) |             |
| The Effect of Medical Cannabis Inpatients With Palliative Pancreatic Cancer                                                      | Neoplasms<br>Pancreatic<br>Cachexia Cancer<br>Cannabis<br>Appetite Loss<br>Palliative Medicine<br>Morbidity<br>Mortality                                                                                                                                                                                                                                                                                                               | Drug: THC and CBD                                    | Unknown                                        | NCT03245658 |
| Cancer treatment                                                                                                                 |                                                                                                                                                                                                                                                                                                                                                                                                                                        |                                                      |                                                |             |
| Effects of Cannabis Use in Cancer Patients: A Feasibility Study                                                                  | Solid Tumor<br>Adult                                                                                                                                                                                                                                                                                                                                                                                                                   | Oral Cannabis                                        | Recruiting                                     | NCT03617692 |
| A Pilot Study to Assess the Role of Cannabis Added to the Supportive Care Regimen During Chemoradiation for Head and Neck Cancer | Head and Neck<br>Cancer                                                                                                                                                                                                                                                                                                                                                                                                                | Observational group using THC/CBD formulations       | Recruiting                                     | NCT03431363 |
| Outcomes Mandate National Integration With Cannabis as Medicine (200,000 participants)                                           | Chronic Pain<br>Fibromyalgia<br>Seizures<br>Hepatitis<br>Cancer<br>Crohn Disease<br>HIV/AIDS<br>Multiple Sclerosis<br>Traumatic Brain Injury<br>Sickle Cell Disease<br>Post-Traumatic Stress Disorder<br>Tourette Syndrome<br>Ulcerative Colitis<br>Glaucoma<br>Epilepsy<br>Inflammatory Bowel Diseases<br>Parkinson Disease<br>Amyotrophic Lateral Sclerosis<br>Chronic Traumatic Encephalopathy<br>Anxiety<br>Depression<br>Insomnia | Drug: Cannabis, Medical Device: RYAH-Medtech Inhaler | Recruiting                                     | NCT03944447 |

|                                                                                                                                                                                                                                 |                                                               |                                                                                                                |                                             |                             |
|---------------------------------------------------------------------------------------------------------------------------------------------------------------------------------------------------------------------------------|---------------------------------------------------------------|----------------------------------------------------------------------------------------------------------------|---------------------------------------------|-----------------------------|
|                                                                                                                                                                                                                                 | Autism<br>Opioid-use<br>Disorder<br>Bipolar Disorder<br>Covid |                                                                                                                |                                             |                             |
| Medical Marijuana in the Pediatric Central Nervous System Tumor Population                                                                                                                                                      | Central Nervous System Tumor<br>Brain Tumor<br>Spinal Tumor   | Drug: Medical Marijuana                                                                                        | Active, not recruiting                      | NCT03052738                 |
| Phase Ib, Open-label, Multicenter, Inpatient Dose-escalation Clinical Trial to Assess the Safety Profile of the TN-TC11G (THC+CBD) Combination With Temozolomide and Radiotherapy in Patients With Newly-diagnosed Glioblastoma | Glioblastoma                                                  | Drug: TN-TC11G Drug: Temozolomide<br>Radiation: Radiotherapy                                                   | Not yet recruiting                          | NCT03529448                 |
| Expression of G Protein-coupled Receptors and Ligands in Inflammatory Bowel Diseases and Colon Cancer                                                                                                                           | Ulcerative colitis<br>Crohn's Disease<br>Colon Cancer         | Ulcerative colitis group<br>Crohn's Disease group<br>Colon Cancer group<br>Control group (healthy individuals) | Completed (no results)                      | NCT02735941                 |
| A Phase I, Sequential Cohort, Open-Label, Dose-escalation Study of the Safety and CNS Pharmacokinetics of Dexanabinol in Patients With Brain Cancer                                                                             | Brain cancer                                                  | Drug: Dexanabinol                                                                                              | Completed (no results)                      | NCT01654497                 |
| A Pilot Study of Dronabinol for Adult Patients With Primary Gliomas                                                                                                                                                             | Brain Neoplasms<br>Nausea<br>Vomiting                         | Drug: Dronabinol                                                                                               | Completed (no publications)                 | NCT00314808                 |
| A Phase 1, Pharmacokinetically-Guided, Dose Escalation Study to Assess the Safety and Tolerability of Dexanabinol in Patients With Advanced Solid Tumors                                                                        | Solid Tumor                                                   | Drug: Dexanabinol<br>Other: Cremophor                                                                          | Progression-free survival increased         | NCT01489826                 |
| A Two Part Study to Assess the Tolerability, Safety and Pharmacodynamics of Sativex in Combination With Dose-intense Temozolomide in Patients With Recurrent Glioblastoma                                                       | Glioblastoma<br>multiforme                                    | Drug: Temozolomide and Sativex                                                                                 | Increased 1-year survival rate in 39% (185) | NCT01812603;<br>NCT01812616 |
| A study: Pure CBD as single agent for solid tumors                                                                                                                                                                              | Solid tumor                                                   | Drug: CBD                                                                                                      | (241)                                       | NCT02255292                 |
| A Phase 1b Study to Assess the Safety and Anti-tumour Activity of Dexanabinol Monotherapy and                                                                                                                                   | Hepatocellular carcinoma<br>Pancreatic cancer                 | Drug: Dexanabinol<br>Drug: Sorafenib<br>Drug: Nab-paclitaxel                                                   | Unknown                                     | NCT02423239                 |

|                                                                                                                                                                                                                                                  |                                                                                                                                                       |                                                                                                                                                                                         |                             |             |
|--------------------------------------------------------------------------------------------------------------------------------------------------------------------------------------------------------------------------------------------------|-------------------------------------------------------------------------------------------------------------------------------------------------------|-----------------------------------------------------------------------------------------------------------------------------------------------------------------------------------------|-----------------------------|-------------|
| Dexanabinol in Combination With Chemotherapy in Patients With Advanced Tumours                                                                                                                                                                   |                                                                                                                                                       | Drug: Gemcitabine                                                                                                                                                                       |                             |             |
| A Phase I Study of BRCX014 to Investigate Dose-Ranging Safety and Pharmacokinetics in Adults With Glioblastoma (GBM) and Non-Methylated MGMT Gene Status                                                                                         | Glioblastoma                                                                                                                                          | Drug: Temozolomide<br>Drug: BRCX014 (cannabinoid formulation)                                                                                                                           | Unknown                     | NCT03687034 |
| Randomized Double-Blind, Placebo-Controlled Parallel Multi-Center Study to Assess the Efficacy of Cannabidiol (BRCX014) Combined With Standard-Of-Care Treatment in Subjects With Multiple Myeloma, Glioblastoma Multiforme, and GI Malignancies | Cancer of Pancreas<br>Cancer of Liver<br>Cancer of Rectum<br>Cancer of Colon<br>Gall Bladder Cancer<br>Multiple Myeloma<br>Glioblastoma<br>Multiforme | Drug: Cannabidiol<br>Drug: Bortezomib<br>Drug: Leucovorin<br>Drug: 5-FU<br>Drug: Oxaliplatin<br>Drug: Bevacizumab<br>Drug: Irinotecan<br>Drug: Gemcitabine<br>Drug: Temozolomide        | Unknown                     | NCT03607643 |
| Safety                                                                                                                                                                                                                                           |                                                                                                                                                       |                                                                                                                                                                                         |                             |             |
| Assessment of Safety, Tolerability and Pharmacokinetics of Single Doses of Oral Dexanabinol in Healthy Subjects                                                                                                                                  | Safety<br>Tolerability<br>Pharmacokinetics<br>Cancer                                                                                                  | Drug: Dexanabinol Dose Level 1<br>Drug: Dexanabinol Dose Level 2<br>Drug: Dexanabinol Dose Level 3<br>Drug: Dexanabinol Dose Level 4<br>Drug: Dexanabinol Dose Level 5<br>Drug: Placebo | Completed (no publications) | NCT02054754 |
| An Observational Post-Marketing Safety Registry Of Patients Who Have Been Prescribed Sativex                                                                                                                                                     | Multiple Sclerosis<br>Diabetes<br>Cancer<br>Neuropathic Pain                                                                                          | Drug: Sativex                                                                                                                                                                           | Completed (no results)      | NCT02073474 |
